# Supplementary material for: Impact of Valve Morphology on the Prevalence of Coronary Artery Disease: A Systematic Review and Meta‐Analysis
Source: PubMed Central journal article supplement — J Am Heart Assoc. 2016 May 18;5(5):e003200. doi: 10.1161/JAHA.116.003200 (PMC4889190; doi:10.1161/jaha.116.003200), 2016-05-18
Supplement: JAH3-5-e003200-s001.pdf [file JAH3-5-e003200-s001.pdf]

## SUPPLEMENTAL MATERIAL

### Impact of Valve Morphology On the Prevalence of Coronary Artery Disease:

#### A Systematic Review and Meta-Analysis

**Figure S1. Distribution of major clinical and demographic characteristics in patients with bicuspid (BAV) and tricuspid aortic valve (TAV).** (A) sex, (B) age, (C) hypertension, (D) diabetes, (E) hyperlipidemia, (F) BMI and (F) smoking.

#### A: Sex

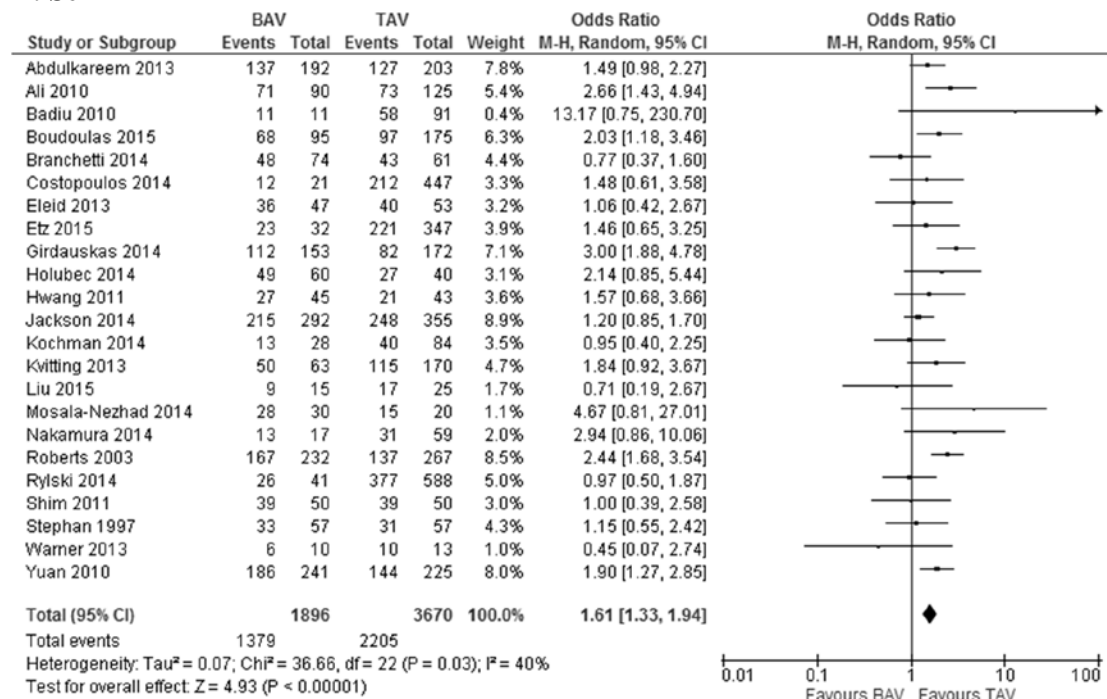

#### B: Age

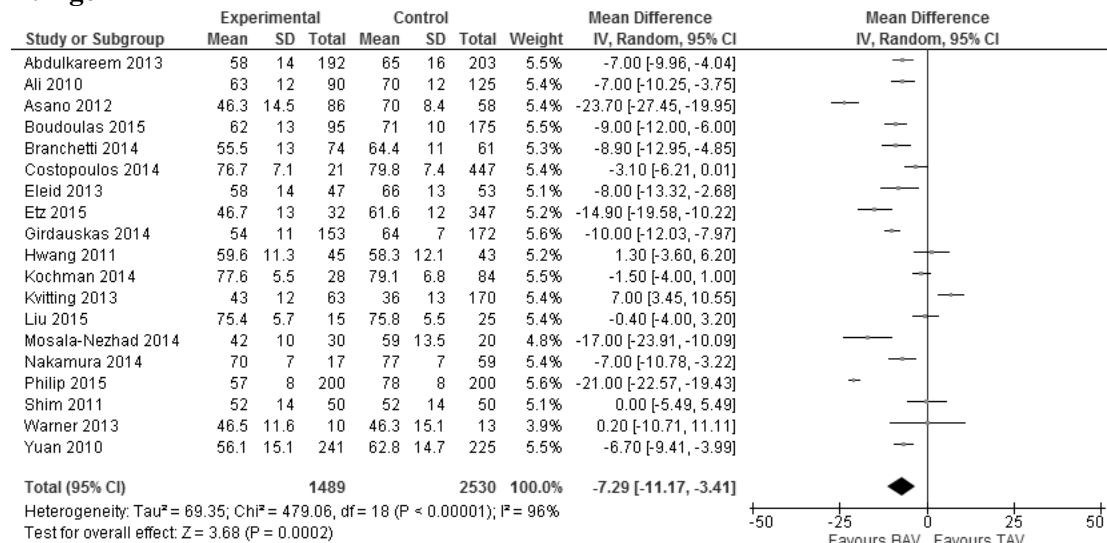

### C: Hypertension

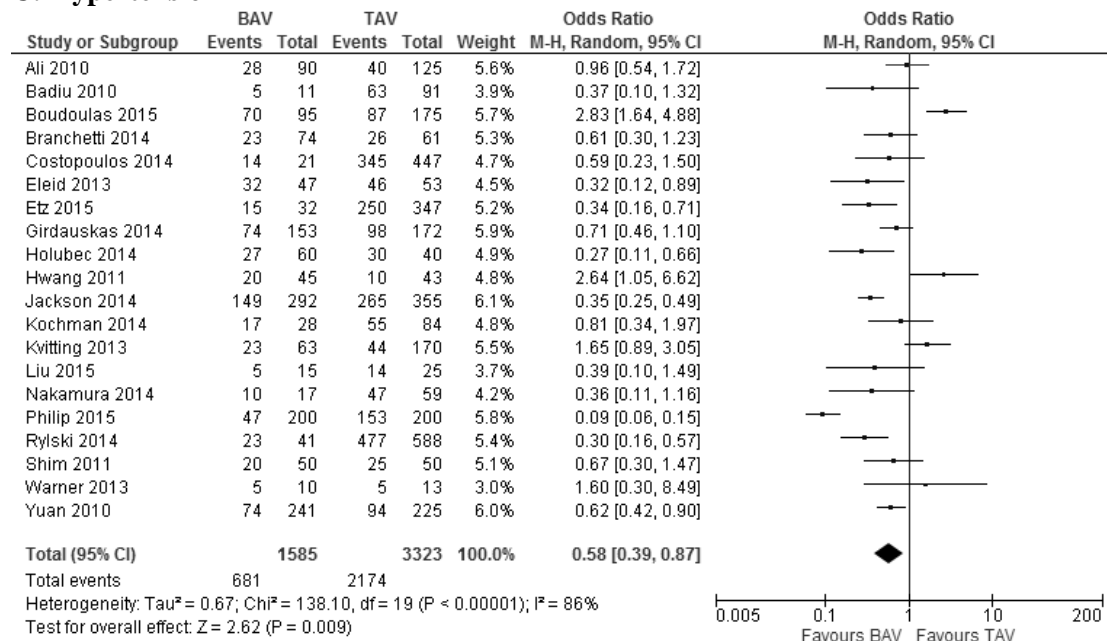

### D: Diabetes

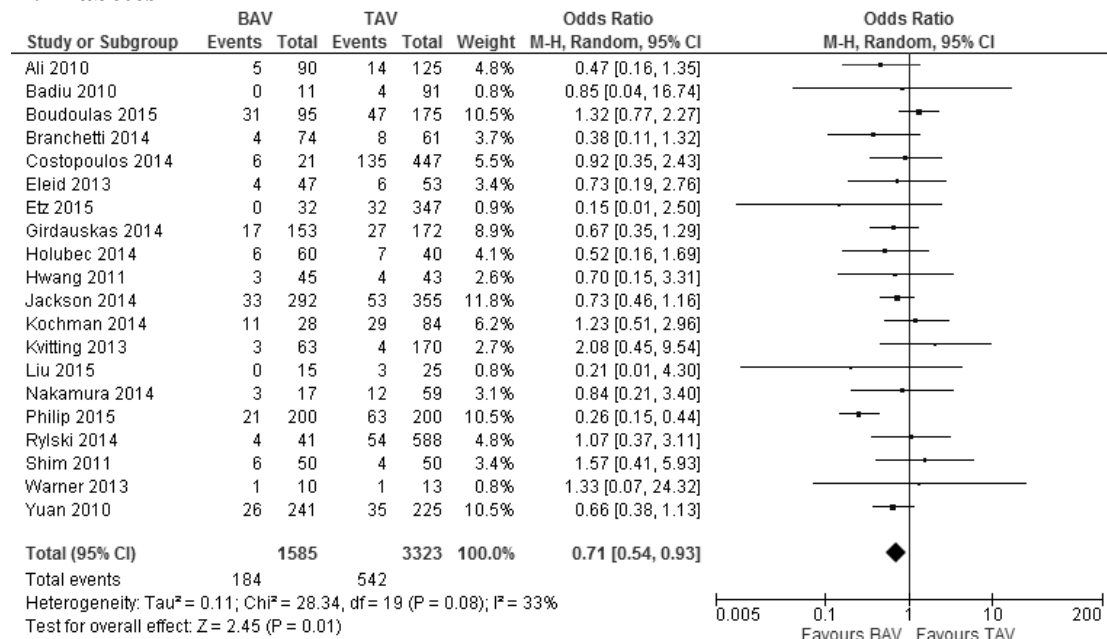

## E: Hyperlipidemia

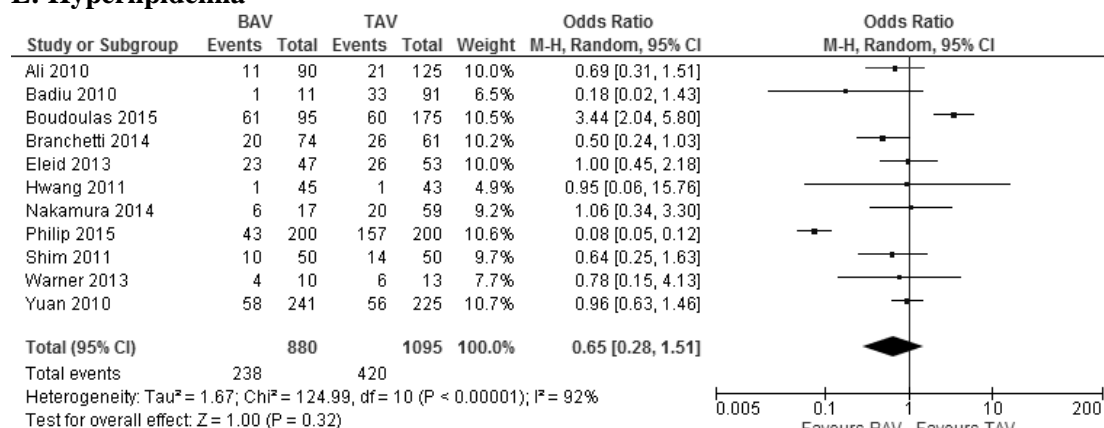

## F: BMI

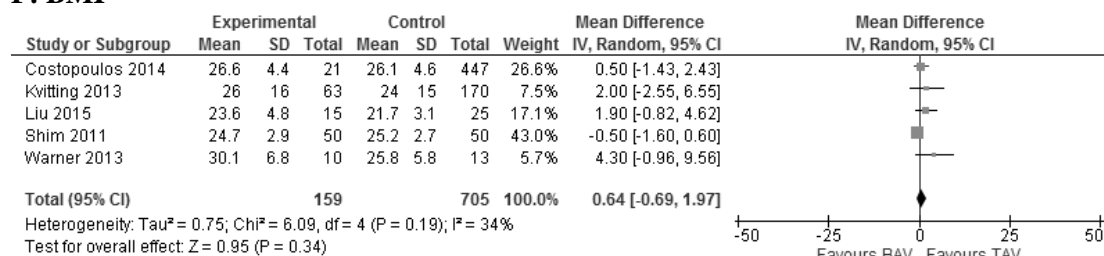

## G: Smoking habit

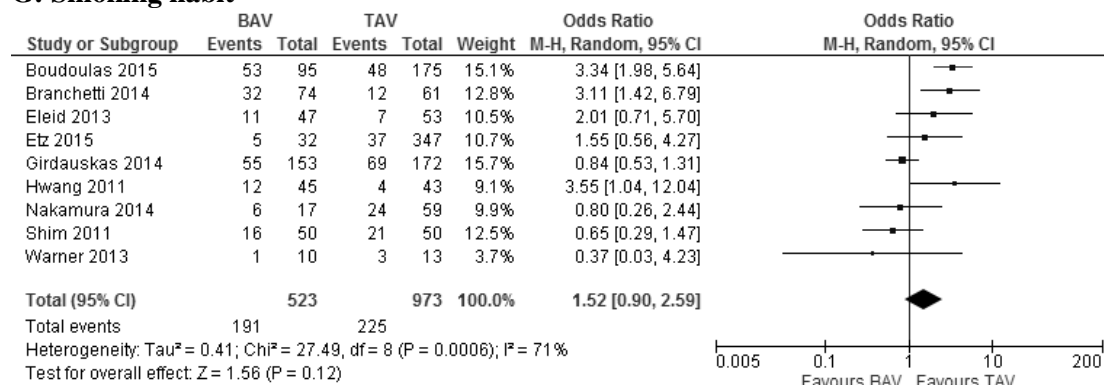

**Figure S2.** Funnel plots of effect size versus standard error for studies evaluating the prevalence of coronary artery disease (A), coronary artery bypass grafting (B), post-operative mortality (C) in patients with bicuspid (BAV) and tricuspid aortic valve (TAV).

**A: Coronary artery disease**

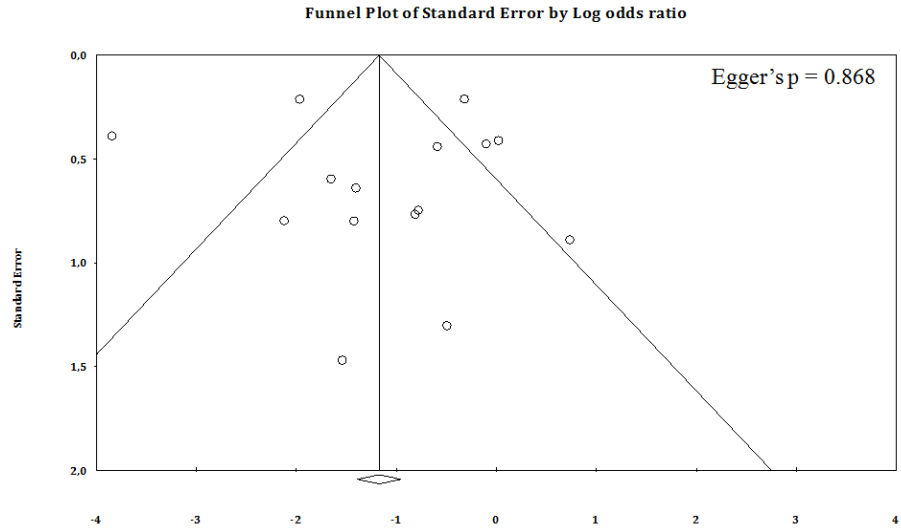

**B: Coronary artery bypass grafting**

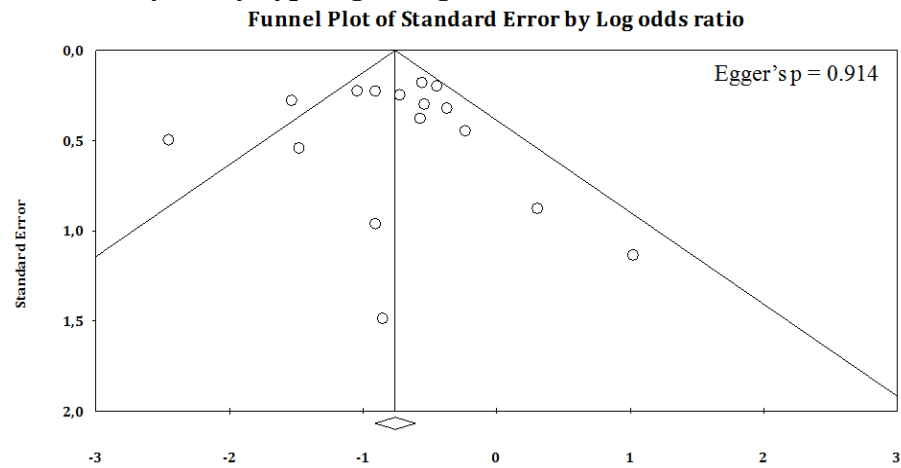

**C: Post-operative mortality**

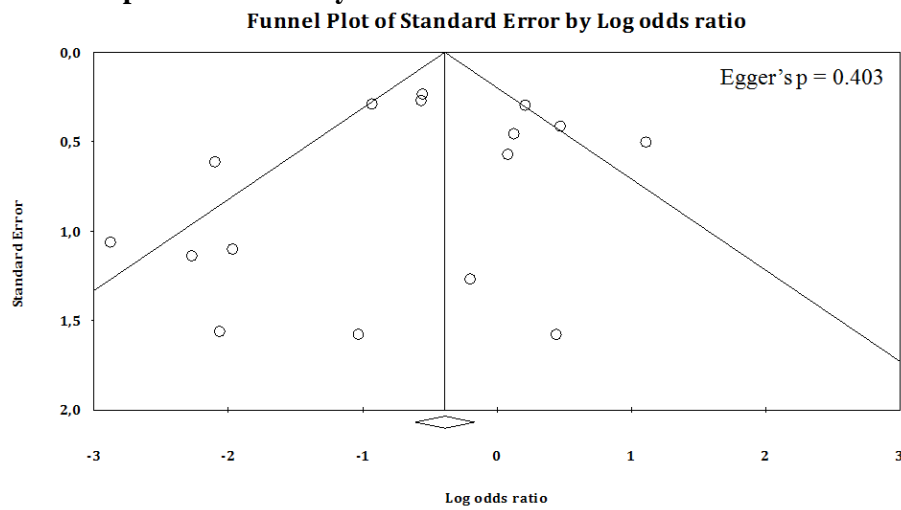

**Table S1. Summary table of meta-analysis results**

| <b>Outcome</b>        | <b>Number of studies</b>              | <b>Effect size</b>                          |
|-----------------------|---------------------------------------|---------------------------------------------|
| <b>CAD</b>            | 15 studies<br>1,163 BAV and 2,234 TAV | OR: 0.33, 95% CI: 0.17, 0.65, p = 0.001     |
| <b>CABG</b>           | 16 studies<br>1,782 BAV and 1,886 TAV | OR: 0.45, 95% CI: 0.35, 0.59, p < 0.001     |
| <b>Mortality</b>      | 16 studies<br>1067 BAV and 2399 TAV   | OR: 0.62, 95% CI: 0.40, 0.97, p = 0.04      |
| <b>Age</b>            | 19 studies<br>1489 BAV and 2530 TAV   | MD: -7.29, 95% CI: -11.17, -3.41, p < 0.001 |
| <b>Male gender</b>    | 23 studies<br>1896 BAV and 3670 TAV   | OR: 1.61, 95% CI: 1.33, 1.94, p < 0.001     |
| <b>Hypertension</b>   | 20 studies<br>1585 BAV and 3323 TAV   | OR: 0.58, 95% CI: 0.39, 0.87, p < 0.001     |
| <b>Diabetes</b>       | 20 studies<br>1585 BAV and 3323 TAV   | OR: 0.71, 95% CI: 0.54, 0.93, p = 0.01      |
| <b>Hyperlipidemia</b> | 11 studies<br>880 BAV and 1095 TAV    | OR: 0.65, 95% CI: 0.28, 1.51, p = 0.32      |
| <b>BMI</b>            | 5 studies<br>159 BAV and 705 TAV      | MD: 0.64, 95% CI: -0.69, 1.97, p = 0.34     |
| <b>Smoking habit</b>  | 9 studies<br>523 BAV and 973 TAV      | OR: 1.52, 95% CI: 0.90, 2.59, p = 0.12      |

CAD: coronary artery disease; CABG: Coronary artery bypass grafting; BMI: body mass index; BAV: bicuspid aortic valve; TAV; tricuspid aortic valve; OR: odds ratio; MD: mean difference; 95% CI: 95% confidence intervals
